# Supplementary material
Source: PubMed Central journal article supplement (PMC3779517)
Supplement: NIHMS497109-supplement-1_si_001.pdf [file NIHMS497109-supplement-1_si_001.pdf]

# Development of a new thiol site-specific prosthetic group and its conjugation with [cys<sup>40</sup>]-exendin-4 for in vivo targeting of insulinomas

Xuyi Yue, Dale O. Kiesewetter, Jinxia Guo, Zhongchan Sun, Xiaoxiang Zhang, Lei Zhu, Gang Niu, Ying Ma, Lixin Lang, Xiaoyuan Chen\*

National Institute of Biomedical Imaging and Bioengineering (NIBIB), National Institutes of Health (NIH), 31 Center Drive, Bethesda, Maryland 20892, United States

## Supporting Information

### Mouse serum stability study

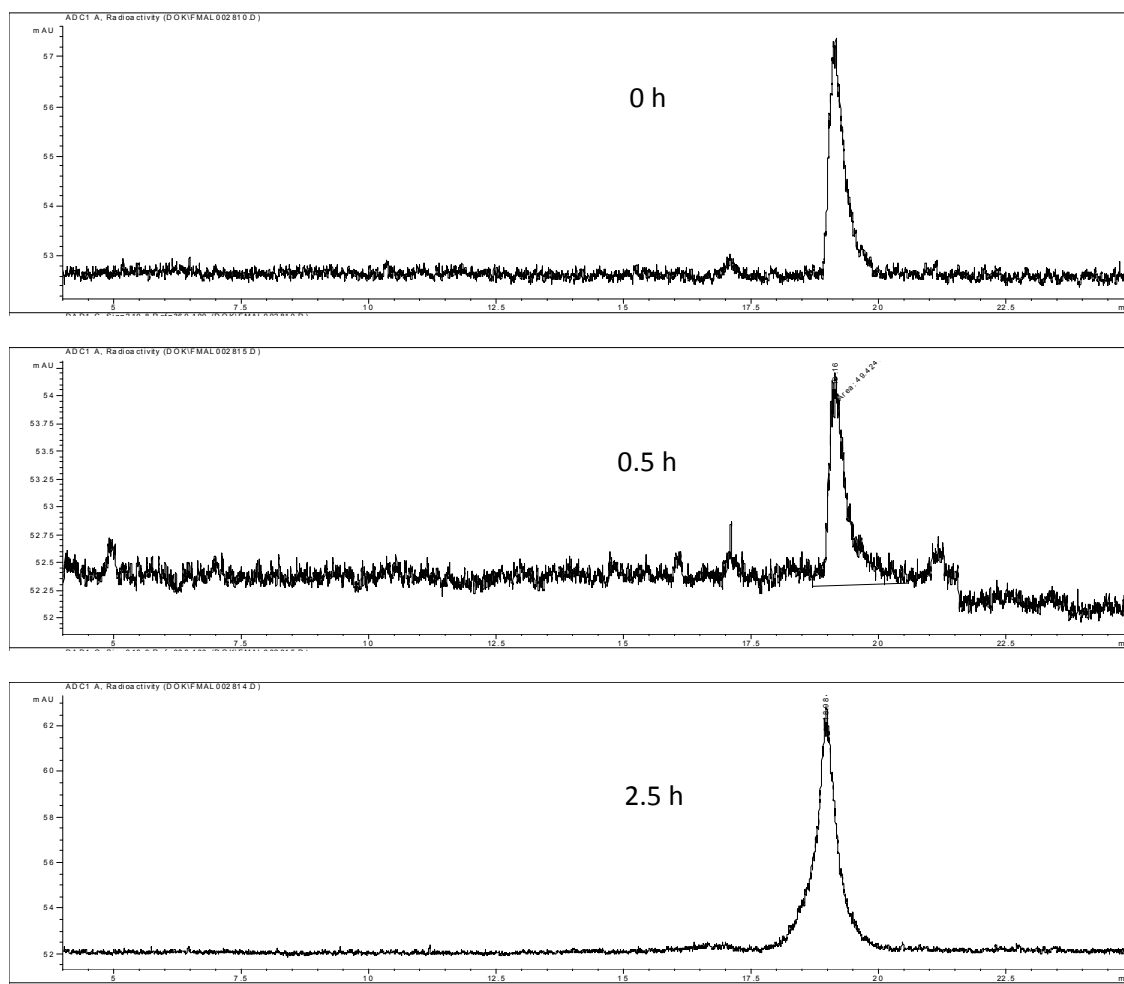

**Figure S1.** Stability studies of [<sup>18</sup>F]FPenM-[cys<sup>40</sup>]-exendin-4 incubated with mouse serum at 0, 0.5, and 2.5 h, respectively.

## Metabolite analysis

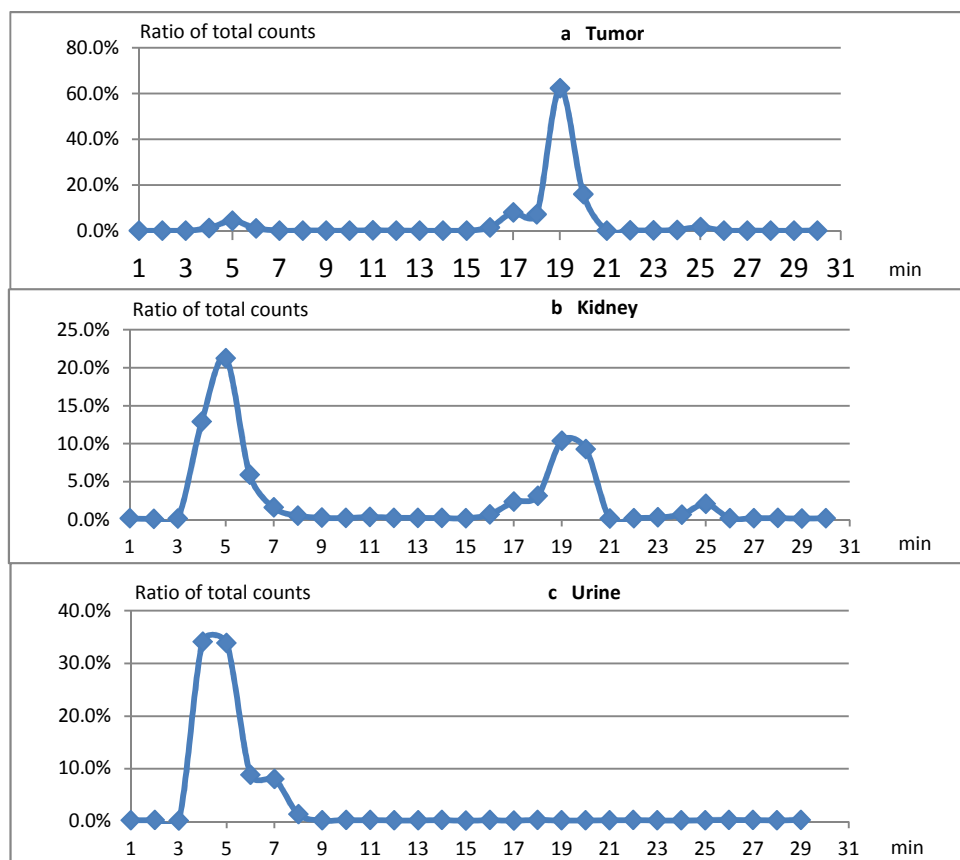

**Figure S2.** Metabolite analysis by reversed-phase HPLC for tumor, kidney and urine samples after [ $^{18}\text{F}$ ]FPenM-[cys $^{40}$ ]-exendin-4 (100  $\mu\text{Ci}$ ) injection.
